# Supplementary material
Source: PubMed Central journal article supplement (PMC1449673)
Supplement: pnas_0506200103_4.pdf [file pnas_0506200103_4.pdf]

**Table 2. Expression of angiogenic factors in dormant and growing MOLT-3 tumors by microarray analysis**

| Probe set   | Symbol    | Description                                                                                                  | Growing tumors |   |   |   |   |   |   |   |   |    | Dormant tumors |   |   |   |   |   |   |   |   | MOLT-3 vt |   |   |   |   |
|-------------|-----------|--------------------------------------------------------------------------------------------------------------|----------------|---|---|---|---|---|---|---|---|----|----------------|---|---|---|---|---|---|---|---|-----------|---|---|---|---|
|             |           |                                                                                                              | 1              | 2 | 3 | 4 | 5 | 6 | 7 | 8 | 9 | 10 | 1              | 2 | 3 | 4 | 5 | 6 | 7 | 8 | 9 |           |   |   |   |   |
| 204422_s_at | bFGF      | Fibroblast growth factor 2 (basic)                                                                           | ■              | ■ | ■ | ■ | ■ | ■ | ■ | ■ | ■ | ■  | ■              | ■ | ■ | ■ | ■ | ■ | ■ | ■ | ■ | ■         | ■ | ■ | ■ |   |
| 214571_at   | FGF3      | Fibroblast growth factor 3                                                                                   | ■              | ■ | ■ | ■ | ■ | ■ | ■ | ■ | ■ | ■  | ■              | ■ | ■ | ■ | ■ | ■ | ■ | ■ | ■ | ■         | ■ | ■ | ■ | ■ |
| 208417_at   | FGF6      | Fibroblast growth factor 6                                                                                   | ■              | ■ | ■ | ■ | ■ | ■ | ■ | ■ | ■ | ■  | ■              | ■ | ■ | ■ | ■ | ■ | ■ | ■ | ■ | ■         | ■ | ■ | ■ | ■ |
| 206404_at   | FGF9      | Fibroblast growth factor 9                                                                                   | ■              | ■ | ■ | ■ | ■ | ■ | ■ | ■ | ■ | ■  | ■              | ■ | ■ | ■ | ■ | ■ | ■ | ■ | ■ | ■         | ■ | ■ | ■ | ■ |
| 211506_s_at | IL8       | Interleukin 8                                                                                                | ■              | ■ | ■ | ■ | ■ | ■ | ■ | ■ | ■ | ■  | ■              | ■ | ■ | ■ | ■ | ■ | ■ | ■ | ■ | ■         | ■ | ■ | ■ | ■ |
| 206295_at   | IL18      | Interleukin 18                                                                                               | ■              | ■ | ■ | ■ | ■ | ■ | ■ | ■ | ■ | ■  | ■              | ■ | ■ | ■ | ■ | ■ | ■ | ■ | ■ | ■         | ■ | ■ | ■ | ■ |
| 205609_at   | ANG1      | Angiopoietin 1                                                                                               | ■              | ■ | ■ | ■ | ■ | ■ | ■ | ■ | ■ | ■  | ■              | ■ | ■ | ■ | ■ | ■ | ■ | ■ | ■ | ■         | ■ | ■ | ■ | ■ |
| 211148_s_at | ANG2      | Angiopoietin 2                                                                                               | ■              | ■ | ■ | ■ | ■ | ■ | ■ | ■ | ■ | ■  | ■              | ■ | ■ | ■ | ■ | ■ | ■ | ■ | ■ | ■         | ■ | ■ | ■ | ■ |
| 210755_at   | HGF       | Hepatocyte growth factor (hepapoietin A; scatter factor)                                                     | ■              | ■ | ■ | ■ | ■ | ■ | ■ | ■ | ■ | ■  | ■              | ■ | ■ | ■ | ■ | ■ | ■ | ■ | ■ | ■         | ■ | ■ | ■ | ■ |
| 210513_s_at | VEGF      | Vascular endothelial growth factor                                                                           | ■              | ■ | ■ | ■ | ■ | ■ | ■ | ■ | ■ | ■  | ■              | ■ | ■ | ■ | ■ | ■ | ■ | ■ | ■ | ■         | ■ | ■ | ■ | ■ |
| 203683_s_at | VEGFB     | Vascular endothelial growth factor B                                                                         | ■              | ■ | ■ | ■ | ■ | ■ | ■ | ■ | ■ | ■  | ■              | ■ | ■ | ■ | ■ | ■ | ■ | ■ | ■ | ■         | ■ | ■ | ■ | ■ |
| 209946_at   | VEGFC     | Vascular endothelial growth factor C                                                                         | ■              | ■ | ■ | ■ | ■ | ■ | ■ | ■ | ■ | ■  | ■              | ■ | ■ | ■ | ■ | ■ | ■ | ■ | ■ | ■         | ■ | ■ | ■ | ■ |
| 205611_at   | TNFSF12   | Tumor necrosis factor (ligand) superfamily, member 12                                                        | ■              | ■ | ■ | ■ | ■ | ■ | ■ | ■ | ■ | ■  | ■              | ■ | ■ | ■ | ■ | ■ | ■ | ■ | ■ | ■         | ■ | ■ | ■ | ■ |
| 218368_s_at | TNFRSF12A | Tumor necrosis factor receptor superfamily, member 12A                                                       | ■              | ■ | ■ | ■ | ■ | ■ | ■ | ■ | ■ | ■  | ■              | ■ | ■ | ■ | ■ | ■ | ■ | ■ | ■ | ■         | ■ | ■ | ■ | ■ |
| 202510_s_at | TNFAIP2   | Tumor necrosis factor, alpha-induced protein 2                                                               | ■              | ■ | ■ | ■ | ■ | ■ | ■ | ■ | ■ | ■  | ■              | ■ | ■ | ■ | ■ | ■ | ■ | ■ | ■ | ■         | ■ | ■ | ■ | ■ |
| 212298_at   | NRP1      | Neuropilin 1                                                                                                 | ■              | ■ | ■ | ■ | ■ | ■ | ■ | ■ | ■ | ■  | ■              | ■ | ■ | ■ | ■ | ■ | ■ | ■ | ■ | ■         | ■ | ■ | ■ | ■ |
| 209747_at   | TGFB3     | Transforming growth factor, beta 3                                                                           | ■              | ■ | ■ | ■ | ■ | ■ | ■ | ■ | ■ | ■  | ■              | ■ | ■ | ■ | ■ | ■ | ■ | ■ | ■ | ■         | ■ | ■ | ■ | ■ |
| 202888_s_at | ANPEP     | Alanyl (membrane) aminopeptidase (aminopeptidase N, aminopeptidase M, microsomal aminoAeAtidase, CD13, A150) | ■              | ■ | ■ | ■ | ■ | ■ | ■ | ■ | ■ | ■  | ■              | ■ | ■ | ■ | ■ | ■ | ■ | ■ | ■ | ■         | ■ | ■ | ■ | ■ |
| 206083_at   | BAI1      | Brain-specific angiogenesis inhibitor 1                                                                      | ■              | ■ | ■ | ■ | ■ | ■ | ■ | ■ | ■ | ■  | ■              | ■ | ■ | ■ | ■ | ■ | ■ | ■ | ■ | ■         | ■ | ■ | ■ | ■ |
| 204966_at   | BAI2      | Brain-specific angiogenesis inhibitor 2                                                                      | ■              | ■ | ■ | ■ | ■ | ■ | ■ | ■ | ■ | ■  | ■              | ■ | ■ | ■ | ■ | ■ | ■ | ■ | ■ | ■         | ■ | ■ | ■ | ■ |
| 205638_at   | BAI3      | Brain-specific angiogenesis inhibitor 3                                                                      | ■              | ■ | ■ | ■ | ■ | ■ | ■ | ■ | ■ | ■  | ■              | ■ | ■ | ■ | ■ | ■ | ■ | ■ | ■ | ■         | ■ | ■ | ■ | ■ |
| 200878_at   | EPAS1     | Endothelial PAS domain protein 1                                                                             | ■              | ■ | ■ | ■ | ■ | ■ | ■ | ■ | ■ | ■  | ■              | ■ | ■ | ■ | ■ | ■ | ■ | ■ | ■ | ■         | ■ | ■ | ■ | ■ |
| 206742_at   | FIGF      | c-fos Induced growth factor (vascular endothelial growth factor D)                                           | ■              | ■ | ■ | ■ | ■ | ■ | ■ | ■ | ■ | ■  | ■              | ■ | ■ | ■ | ■ | ■ | ■ | ■ | ■ | ■         | ■ | ■ | ■ | ■ |
| 207351_s_at | SH2D2A    | SH2 domain protein 2A                                                                                        | ■              | ■ | ■ | ■ | ■ | ■ | ■ | ■ | ■ | ■  | ■              | ■ | ■ | ■ | ■ | ■ | ■ | ■ | ■ | ■         | ■ | ■ | ■ | ■ |
| 205767_at   | EREG      | Epiregulin                                                                                                   | ■              | ■ | ■ | ■ | ■ | ■ | ■ | ■ | ■ | ■  | ■              | ■ | ■ | ■ | ■ | ■ | ■ | ■ | ■ | ■         | ■ | ■ | ■ | ■ |
| 219700_at   | TEM7      | Tumor endothelial marker 7 precursor                                                                         | ■              | ■ | ■ | ■ | ■ | ■ | ■ | ■ | ■ | ■  | ■              | ■ | ■ | ■ | ■ | ■ | ■ | ■ | ■ | ■         | ■ | ■ | ■ | ■ |
| 209652_s_at | PLGF      | Placental growth factor, vascular endothelial growth factor-related protein                                  | ■              | ■ | ■ | ■ | ■ | ■ | ■ | ■ | ■ | ■  | ■              | ■ | ■ | ■ | ■ | ■ | ■ | ■ | ■ | ■         | ■ | ■ | ■ | ■ |
| 217497_at   | ECGF1     | Endothelial cell growth factor 1 (platelet-derived)                                                          | ■              | ■ | ■ | ■ | ■ | ■ | ■ | ■ | ■ | ■  | ■              | ■ | ■ | ■ | ■ | ■ | ■ | ■ | ■ | ■         | ■ | ■ | ■ | ■ |

Selected genes: biological process/angiogenesis (HG-U133A): ■ = absent ■ = present
