# Supplementary material
Source: PubMed Central journal article supplement (PMC1449673)

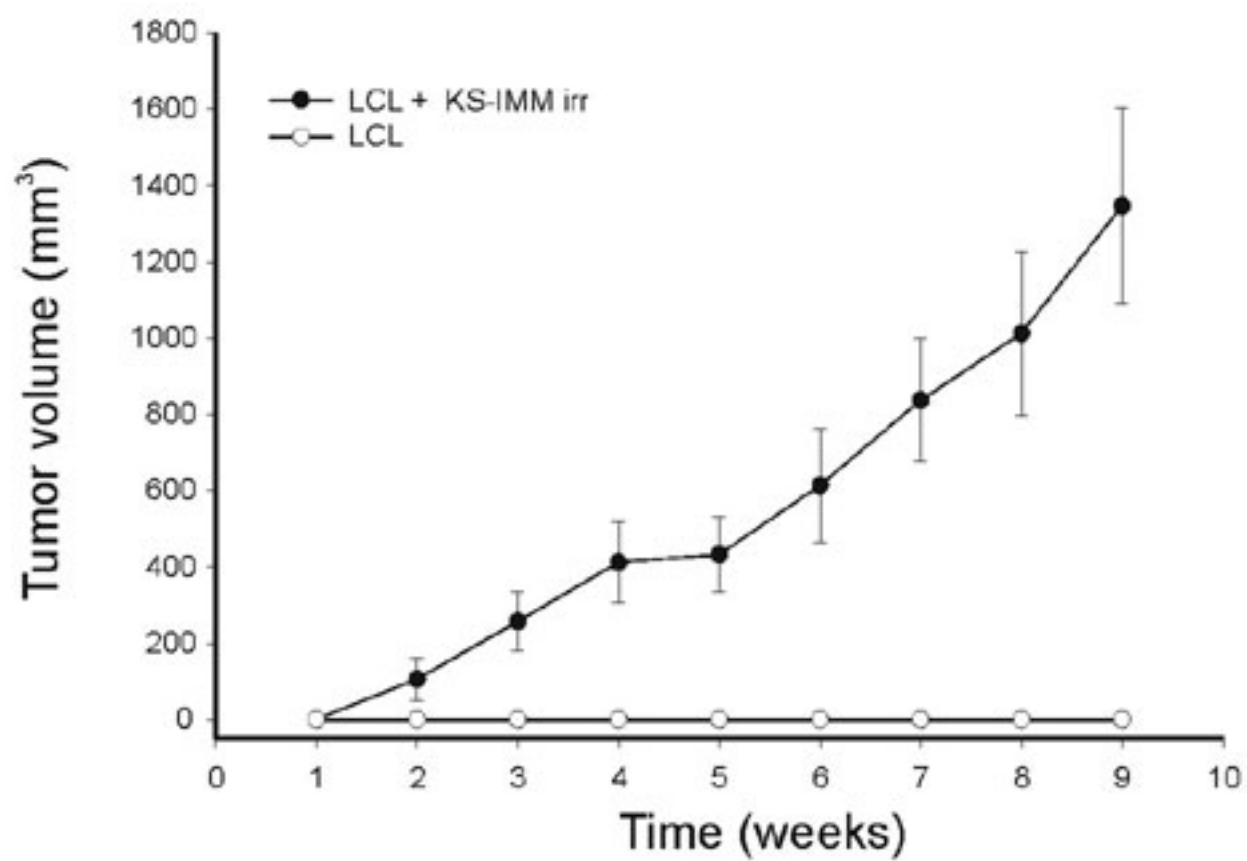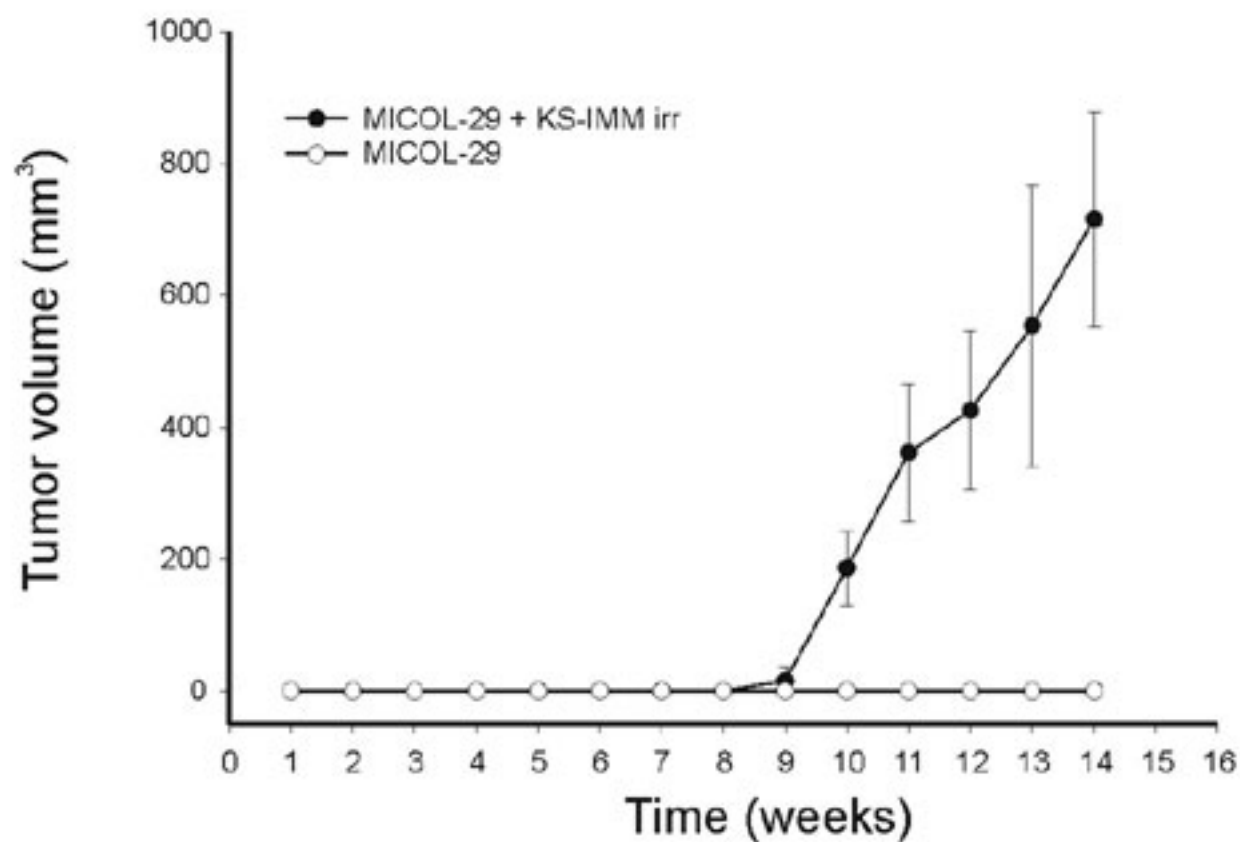

Supplement: pnas_0506200103_1.pdf [file pnas_0506200103_1.pdf]

**A**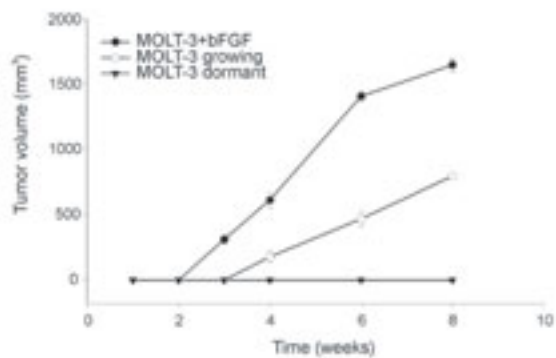**B**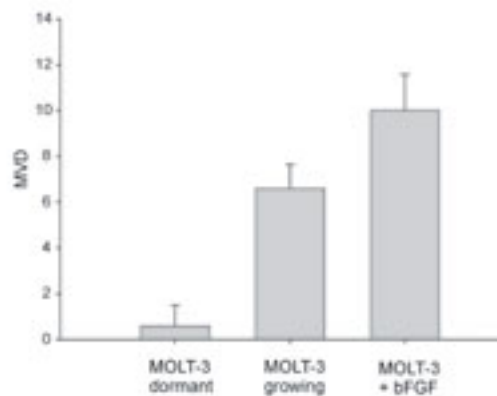**C**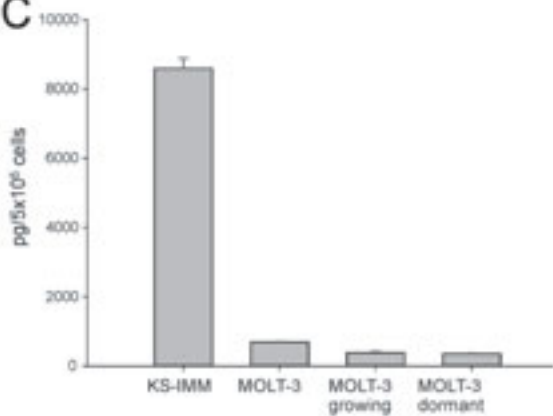**D**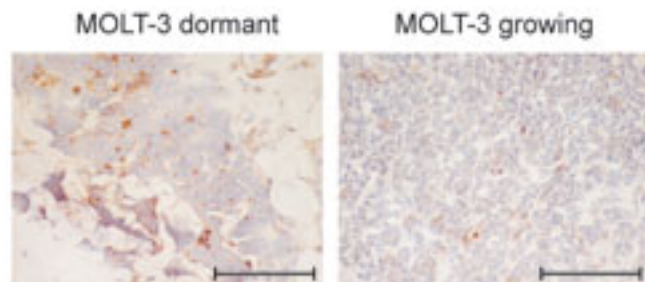

Supplement: pnas_0506200103_2.pdf [file pnas_0506200103_2.pdf]

**A**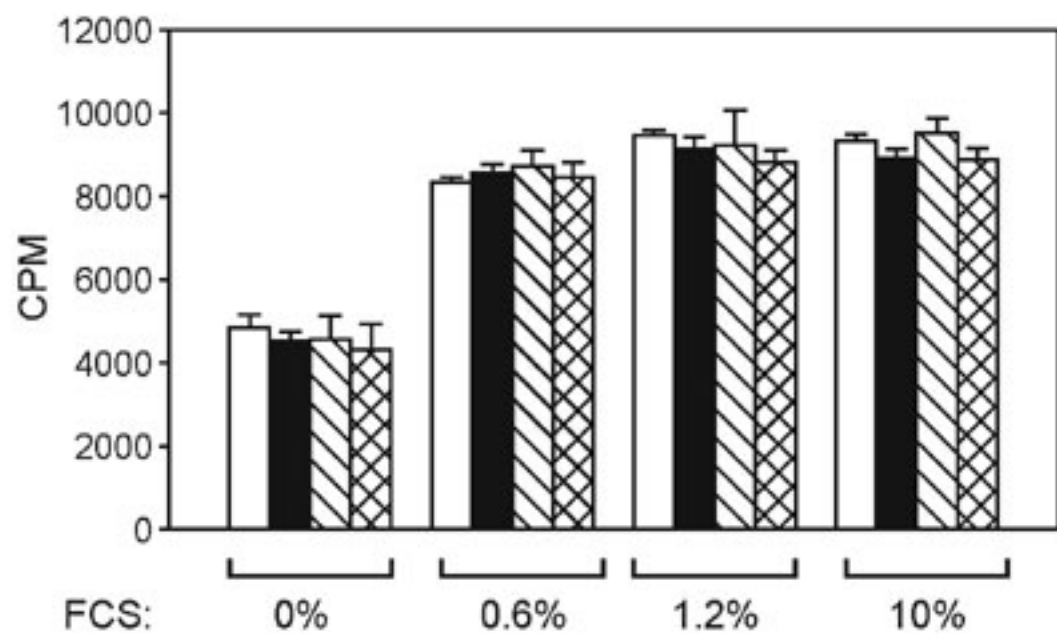**B**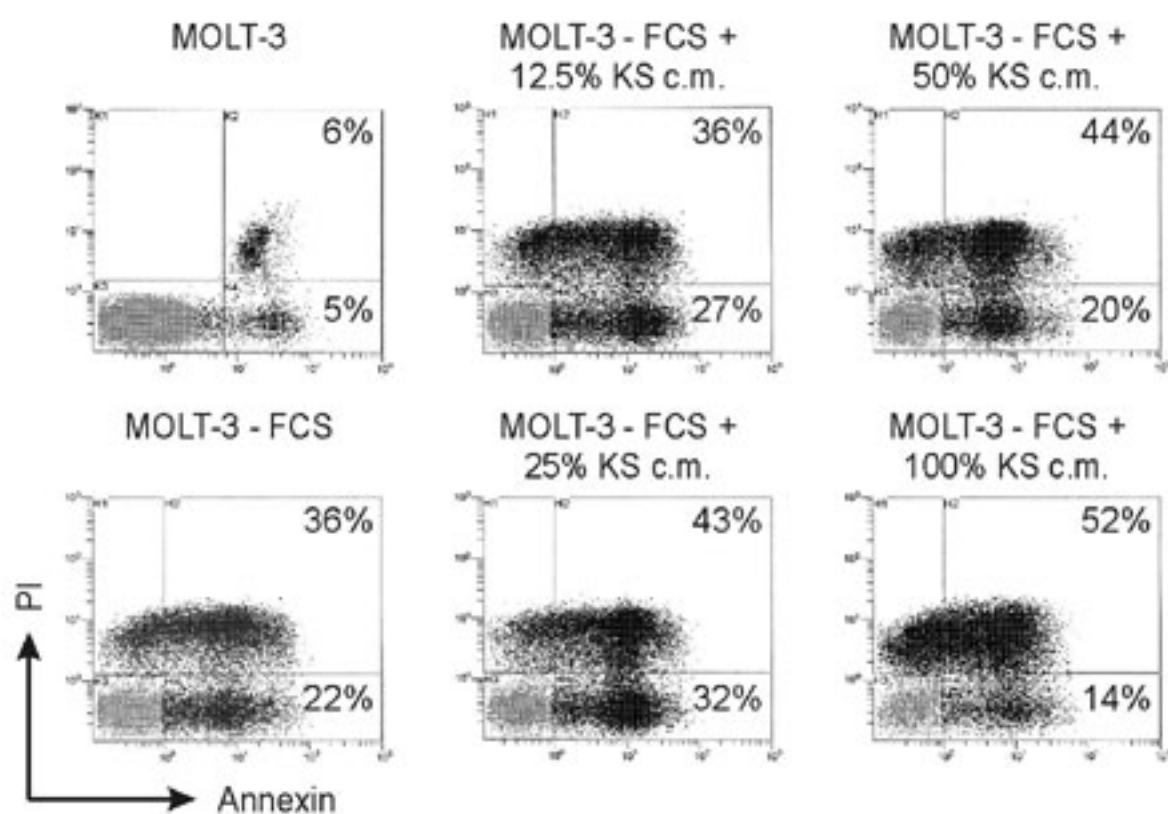**C**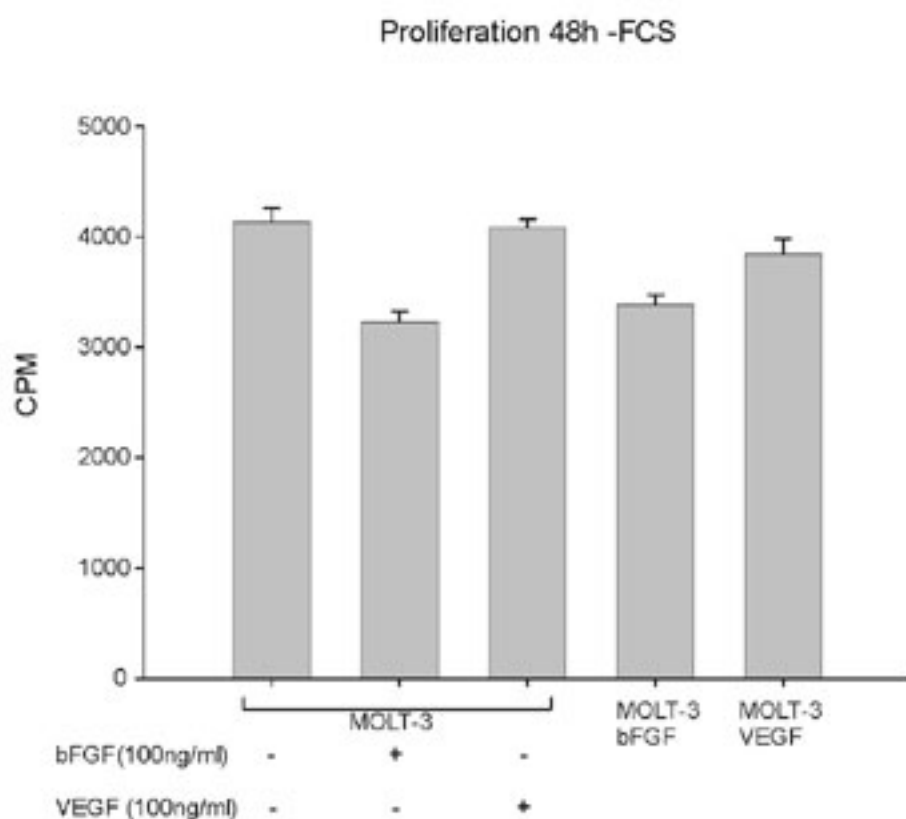

Supplement: pnas_0506200103_3.pdf [file pnas_0506200103_3.pdf]
